# Supplementary material
Source: publisher figshare collection journal article supplement (https://acs.figshare.com/ndownloader/files/4283190)
Supplement: Supplementary file 1 [file 4283190]

# Supporting Information

## Construction and Structural Analysis of Tethered Lipid Bilayer Containing Photosynthetic Antenna Proteins for Functional Analysis

*Ayumi Sumino,<sup>†</sup> Takehisa Dewa,<sup>†, §, \*</sup> Toshikazu Takeuchi,<sup>†</sup> Ryuta Sugiura,<sup>†</sup> Nobuaki Sasaki,<sup>†</sup> Nobuo Misawa,<sup>||</sup> Ryugo Tero,<sup>||</sup> Tsuneo Urisu,<sup>||</sup> Alastair T. Gardiner,<sup>^</sup> Richard J. Cogdell,<sup>^</sup> Hideki Hashimoto,<sup>‡, ⊥</sup> and Mamoru Nango,<sup>†, ‡, ⊥, \*</sup>*

<sup>†</sup>Department of Frontier Materials, Graduate School of Engineering, Nagoya Institute of Technology, Gokiso-cho, Showa-ku, Nagoya 466-8555, Japan, <sup>§</sup>PRESTO/JST, <sup>||</sup>Division of Biomolecular Sensing, Institute for Molecular Science, Myodaizi, Okazaki 444-8585, Japan, <sup>^</sup>Institute of Molecular, Cell and Systems Biology, College of Medical, Veterinary and Life Sciences, University of Glasgow, University Avenue, G12 8QQ. U.K. <sup>‡</sup>The OCU Advanced Research Institute for Natural Science and Technology (OCARINA), Osaka City University, 3-3-138 Sugimoto, Sumiyoshi-ku, Osaka 558-8585, Japan, <sup>⊥</sup>CREST/JST

takedewa@nitech.ac.jp, nango@sci.osaka-cu.ac.jp

**TIRF microscopic images showing nonspecific binding of liposome onto avidin-immobilized coverglass.**

**(page S2) (Figure S1)**

**Height distribution of protuberant domain of LH1-RC from the membrane surface.**

**(page S3) (Figure S2)**

**Leakage of Co<sup>2+</sup> ions through lipid membranes. Time courses of fluorescence quenching by Co<sup>2+</sup> leakage through lipid membranes.**

**(page S4) (Figure S3)**

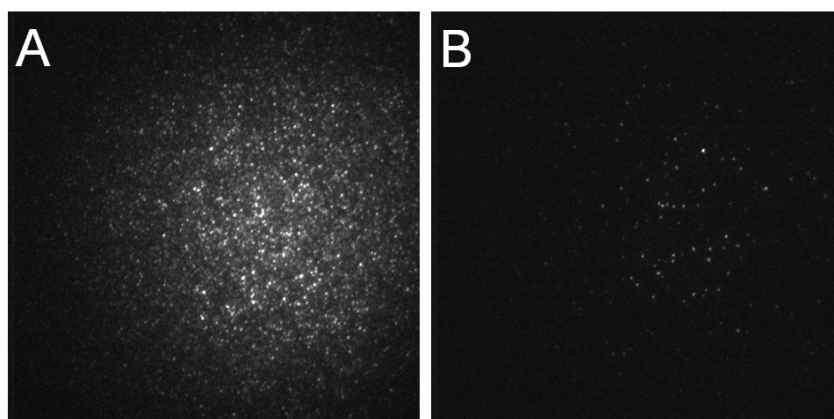

**Figure S1.** TIRF microscopic images of immobilized liposomes with (A) and without (B) 1 mol% biotinylated lipid on avidin-immobilized coverglass. LUV suspensions were applied onto avidin-immobilized coverglass and incubated for 5 min, followed by rinsing with 1M NaCl/HEPES buffer (pH 7.4) to remove unabsorbed vesicles. Scale: 65  $\times$  65  $\mu$ m.

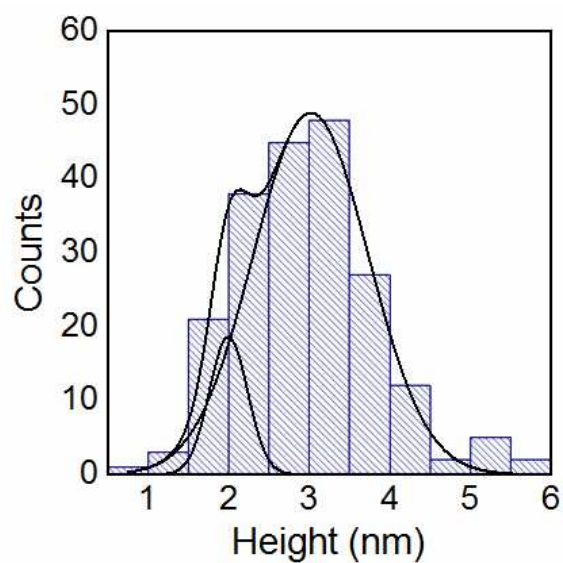

**Figure S2.** Height distribution of protuberant domain of LH1-RC from the membrane surface estimated by AFM measurement. Gaussian fitting analysis (solid lines) provided two components, 2 nm and ~3 nm of maxima, corresponding to periplasmic and cytoplasmic (H-subunit side) domains of LH1-RC, respectively. The ratio of peak areas, periplasmic/cytoplasmic domains, is 11/89.

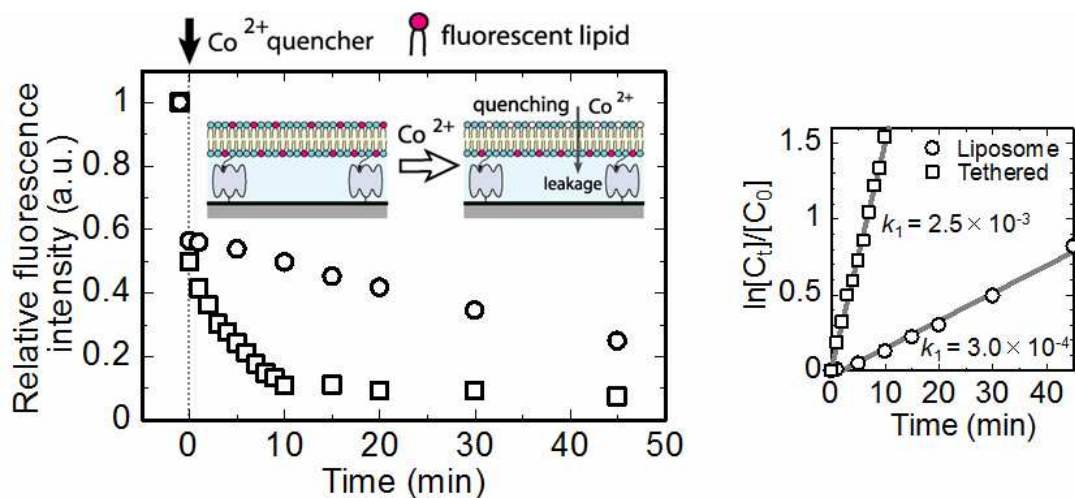

**Figure S3.** Left panel: timecourses of fluorescence intensity of *N*-Rh-DOPE incorporated into the tethered ( $\square$ ) and liposomal membranes ( $\circ$ ). Addition of  $\text{CoCl}_2$  solution (indicated by the black arrow) onto the upper aqueous solution of the planar membrane (or into the liposomal solution) causes fluorescence quenching of *N*-Rh-DOPE in the upper (or the outer) leaflet immediately. Following the quick quenching (by  $\sim 50\%$  of the intensity), the fluorescence gradually decreases due to the  $\text{Co}^{2+}$  ion leakage across the membranes. Right panel: first order kinetics of the slow process of the fluorescence quenching for the tethered and liposomal membranes.
